# Supplementary material for: A DFT study on carbon monoxide adsorption onto hydroxylated α-Al2O3(0001) surfaces
Source: Royal Society of Chemistry journal article supplement (doi:10.1039/c4cp01373e), 2014-01-01
Supplement: c4cp01373e1.pdf [file c4cp01373e1.pdf]

## Supporting Information

### DFT study of carbon monoxide adsorption onto hydroxylated $\alpha$ - $\text{Al}_2\text{O}_3$ (0001) surfaces.

**Table SM1:**

Structural and vibrational properties of free and adsorbed CO.

|                                            | Free CO | 2 x 2                   | 2 x 2                                               | 2 x 2                                               | 1 x 1 |
|--------------------------------------------|---------|-------------------------|-----------------------------------------------------|-----------------------------------------------------|-------|
| Adsorption site                            | --      | $\text{Al}_{1\text{S}}$ | $\text{Al}_{1\text{S}}$ and $\text{Al}_{4\text{S}}$ | $\text{Al}_{1\text{S}}$ and $\text{Al}_{3\text{S}}$ | --    |
| coverage [%]                               | --      | 25                      | 50                                                  | 75                                                  | 100   |
| $r_{\text{C-O}}$ [Å]                       | 1.154   | 1.149                   | 1.150                                               | 1.151                                               | 1.152 |
| $r_{\text{Al-C}}$ [Å]                      | --      | 2.148                   | 2.160                                               | 2.170                                               | 2.183 |
| $\nu_{\text{C-O}}$ [ $\text{cm}^{-1}$ ]    | 2170    | 2226                    | 2215                                                | 2203 <sup>15</sup>                                  | 2200  |
| $\Delta_{\text{C-O}}$ [ $\text{cm}^{-1}$ ] |         | 56                      | 45                                                  | 32                                                  | 30    |
| Adsorption energy [eV]                     | --      | 0.52                    | 0.48                                                | 0.45                                                | 0.42  |

<sup>15</sup> An average value of the  $\text{Al}_{1\text{S}}$  and  $\text{Al}_{3\text{S}}$  is presented.

**Table SM2:**

Comparison of inter layer distances in Å of different water coverage is presented for adsorption sites in 1-4 configuration.

| Inter layer spacing [Å]                          | Coverage [%] | Al <sub>1S</sub> | Al <sub>2S</sub> | Al <sub>3S</sub> | Al <sub>4S</sub> |
|--------------------------------------------------|--------------|------------------|------------------|------------------|------------------|
|                                                  |              |                  |                  |                  |                  |
| Al <sub>1</sub> /O <sub>2</sub>                  | 25           | --               | --               | --               | -0.211           |
| Al <sub>1</sub> /O <sub>2</sub>                  | 50           | --               | -0.102           | --               | -0.101           |
| Al <sub>1</sub> /O <sub>2</sub> <sup>16</sup>    | 50           | <b>0.683</b>     | --               | <b>0.683</b>     | --               |
| Al <sub>1</sub> /O <sub>2</sub> <sup>17</sup>    | 75           | -0.147           | <b>0.719</b>     | --               | <b>0.702</b>     |
| Al <sub>1</sub> /O <sub>2</sub> <sup>18</sup>    | 75           | -0.496           | --               | --               | --               |
| Al <sub>1</sub> /O <sub>2</sub> <sup>19</sup>    | 100          | <b>0.537</b>     | <b>0.537</b>     | <b>0.537</b>     | <b>0.537</b>     |
|                                                  |              |                  |                  |                  |                  |
| O <sub>S</sub> /O <sub>2</sub> <sup>20, 16</sup> | 50           | 0.132            | --               | 0.132            | --               |
| O <sub>S</sub> /O <sub>2</sub> <sup>20, 17</sup> | 75           | 0                | 0.126            | --               | 0.134            |
| O <sub>S</sub> /O <sub>2</sub> <sup>20, 19</sup> | 100          | 0.184            | 0.184            | 0.184            | 0.184            |

<sup>16</sup> Results of the (1 × 2) surface are represented, where water adsorbs in a linear fashion inflicting a 1-4 configuration on the occupied Al adsorption sites.

<sup>17</sup> The 75 % coverage with water adsorption in 1-4 configuration with respect to two Al adsorption sites is presented.

<sup>18</sup> The 75 % coverage with no water adsorption in 1-4 configuration is presented.

<sup>19</sup> Results of the (1 × 1) surface are represented.

<sup>20</sup> The relaxation of the protonated O being a nearest neighbour of the indicated Al adsorption site is given.

The subscript number indicates that layer number starting from the surface. The bold numbers represent lateral movement induced by OH at an adsorption site. Interlayer distances were computed by averaging over all atoms within one layer. The only exception to this is the O<sub>S</sub> of O<sub>S</sub>-H.

**Table SM3:**

Comparison of inter layer distances in Å of different water coverage is presented for adsorption sites not in 1-4 configuration.

| Inter layer spacing [Å]                          | Coverage [%] | Al <sub>1S</sub> | Al <sub>2S</sub> | Al <sub>3S</sub> | Al <sub>4S</sub> |
|--------------------------------------------------|--------------|------------------|------------------|------------------|------------------|
| Al <sub>1</sub> /O <sub>2</sub>                  | 25           | 0.112            | <b>0.742</b>     | 0.125            | --               |
| Al <sub>1</sub> /O <sub>2</sub>                  | 50           | <b>0.755</b>     | --               | <b>0.755</b>     | --               |
| Al <sub>1</sub> /O <sub>2</sub> <sup>21</sup>    | 50           | --               | 0.079            | --               | 0.079            |
| Al <sub>1</sub> /O <sub>2</sub> <sup>22</sup>    | 75           | --               | --               | <b>0.747</b>     | --               |
| Al <sub>1</sub> /O <sub>2</sub> <sup>23</sup>    | 75           | --               | <b>0.778</b>     | <b>0.782</b>     | <b>0.782</b>     |
| O <sub>S</sub> /O <sub>2</sub> <sup>24</sup>     | 25           | 0                | 0.100            | 0                | 0                |
| O <sub>S</sub> /O <sub>2</sub> <sup>24</sup>     | 50           | 0.094            | --               | 0.095            | --               |
| O <sub>S</sub> /O <sub>2</sub> <sup>24, 22</sup> | 75           | --               | --               | 0.112            | --               |
| O <sub>S</sub> /O <sub>2</sub> <sup>24, 23</sup> | 75           | --               | 0.150            | 0.153            | 0.151            |

<sup>21</sup> Results of a (1 x 2) cell are represented, where water adsorbs in a linear fashion inflicting a 1-4 configuration on the occupied Al adsorption sites.

<sup>22</sup> The 75 % coverage with water adsorption in 1-4 configuration with respect to two Al adsorption sites is presented.

<sup>23</sup> The 75 % coverage with no water adsorption in 1-4 configuration is presented.

<sup>24</sup> The relaxation of the protonated O being a nearest neighbour of the indicated Al adsorption site is given.

The subscript number indicates that layer number starting from the surface. The bold numbers represent lateral movement induced by OH at an adsorption site. Interlayer distances were computed by averaging over all atoms within one layer. In case of the O<sub>S</sub>-H adsorption site the averaging was done with respect to the non-protonated O<sub>S</sub> counterparts.

**Table SM4:**

The influence of the 1-4 configuration with respect to structural and vibrational properties of CO and the adsorbed water molecules at total surface coverage of 50 % and 75 % are presented.

|                                    | (2 x 2)              | (2 x 2) | (2 x 2)             | (2 x 2) |
|------------------------------------|----------------------|---------|---------------------|---------|
|                                    |                      |         |                     |         |
| H <sub>2</sub> O coverage [%]      | 25                   | 25      | 50                  | 50      |
| CO coverage [%]                    | 25                   | 25      | 25                  | 25      |
| Species in 1-4 configuration       | free adsorption site | CO      | OH                  | CO      |
|                                    | A                    | B       | C                   | D       |
| $r_{C-O}$ [Å]                      | 1.148                | 1.148   | 1.148               | 1.147   |
| $r_{Al-C}$ [Å]                     | 2.161                | 2.175   | 2.164               | 2.170   |
| $r_{Al-OH}$ [Å]                    | 1.731                | 1.735   | 1.730 <sup>25</sup> | 1.730   |
| $r_{O-H}$ [Å]                      | 0.971                | 0.972   | 0.971 <sup>25</sup> | 0.971   |
| $r_{Os-H}$ [Å]                     | 0.985                | 0.982   | 0.984 <sup>25</sup> | 0.984   |
|                                    |                      |         |                     |         |
| $\nu_{C-O}$ [cm <sup>-1</sup> ]    | 2225                 | 2232    | 2233                | 2240    |
| $\Delta_{C-O}$ [cm <sup>-1</sup> ] | 55                   | 62      | 63                  | 70      |
| $\nu_{O-H}$ [cm <sup>-1</sup> ]    | 3936                 | 3925    | 3935                | 3914    |
| $\nu_{Os-H}$ [cm <sup>-1</sup> ]   | 3696                 | 3740    | 3698                | 3733    |
| CO adsorbtion energy [eV]          | 0.57                 | 0.44    | 0.51                | 0.52    |

<sup>25</sup> Average values are presented.

**Table SM5:**

The influence of the 1-4 configuration with respect to structural and vibrational properties of CO and the adsorbed water molecules at total surface coverage of 100 %.

|                                    | (1 x 2) | (1 x 2) | (2 x 2)                                       |
|------------------------------------|---------|---------|-----------------------------------------------|
| H <sub>2</sub> O coverage [%]      | 50      | 50      | 75                                            |
| CO coverage [%]                    | 50      | 50      | 25                                            |
| Species in 1-4 configuration       | OH      | CO      | CO/<br>OH                                     |
|                                    | E       | F       | G                                             |
| $r_{C-O}$ [Å]                      | 1.149   | 1.150   | 1.147                                         |
| $r_{Al-C}$ [Å]                     | 2.167   | 2.195   | 2.177                                         |
| $r_{Al-OH}$ [Å]                    | 1.738   | 1.737   | 1.728 <sup>26,27</sup><br>1.732 <sup>28</sup> |
| $r_{O-H}$ [Å]                      | 0.971   | 0.972   | 0.972 <sup>26,27</sup><br>0.973 <sup>28</sup> |
| $r_{Os-H}$ [Å]                     | 0.984   | 0.982   | 0.984 <sup>26,27</sup><br>0.982 <sup>28</sup> |
| $\nu_{C-O}$ [cm <sup>-1</sup> ]    | 2227    | 2225    | 2242                                          |
| $\Delta_{C-O}$ [cm <sup>-1</sup> ] | 57      | 52      | 72                                            |
| $\nu_{O-H}$ [cm <sup>-1</sup> ]    | 3922    | 3915    | 3921 <sup>26,27</sup><br>3914 <sup>28</sup>   |
| $\nu_{Os-H}$ [cm <sup>-1</sup> ]   | 3683    | 3720    | 3701 <sup>26,27</sup><br>3747 <sup>28</sup>   |
| CO adsorbtion energy [eV]          | 0.51    | 0.44    | 0.48                                          |

<sup>26</sup> Average values are presented.

<sup>27</sup> Al-OH adsorption site in 1-4 position is presented.

<sup>28</sup> Al-OH adsorption site inflicting 1-4 position upon CO adsorption is presented.

**Table SM6:**

Comparison of inter layer distance in Å with respect to the CO adsorption site in 1-4 configuration (Al CO 1-4) and the CO site which is not in 1-4 configuration (Al CO) are given. In addition the OH adsorption site (Al OH Inflicting 1-4) inflicting a 1-4 arrangement onto adsorption sites of OH (Al OH 1-4), CO or the free Al adsorption site (Al Free 1-4) as well as the free adsorption site not in 1-4 configuration are shown.

| Inter layer spacing [Å]         | Coverage H <sub>2</sub> O/CO[%] | Al CO 1-4 | Al CO | Al OH 1-4              | Al OH Inflicting 1-4 | Al Free 1-4 | Al Free             |
|---------------------------------|---------------------------------|-----------|-------|------------------------|----------------------|-------------|---------------------|
| Al <sub>1</sub> /O <sub>2</sub> | A<br>25/25                      | --        | 0.364 | --                     | 0.748                | -0.342      | 0.093               |
| Al <sub>1</sub> /O <sub>2</sub> | B<br>25/25                      | 0.301     | --    | --                     | 0.728                | --          | 0.046 <sup>32</sup> |
| Al <sub>1</sub> /O <sub>2</sub> | C<br>50/25                      |           | 0.344 | 0.694                  | 0.693                | --          | 0.030               |
| Al <sub>1</sub> /O <sub>2</sub> | D<br>50/25                      | 0.312     | --    | 0.732 <sup>30,31</sup> | 0.732 <sup>30</sup>  | -0.337      | --                  |
| Al <sub>1</sub> /O <sub>2</sub> | E<br>50/50 <sup>29</sup>        | --        | 0.279 | 0.651                  | 0.651                | --          | --                  |
| Al <sub>1</sub> /O <sub>2</sub> | F<br>50/50 <sup>29</sup>        | 0.233     | --    | --                     | 0.655                | --          | --                  |
| Al <sub>1</sub> /O <sub>2</sub> | G<br>75/25                      | 0.295     | --    | 0.681 <sup>32</sup>    | 0.712                | --          | --                  |

<sup>29</sup> Results of a 1x2 super cell are represented.

<sup>30</sup> This Al adsorption site is inflicting 1-4 configuration upon CO.

<sup>31</sup> This Al adsorption site is inflicting 1-4 configuration upon the free Al adsorption site.

<sup>32</sup> An average value of the two equivalent adsorption site is presented.

The subscript number indicates the layer number starting from the surface. Interlayer distances were computed by averaging over all atoms within one layer.

**Table SM7:**

Comparison of inter layer distance in Å of the O<sub>S</sub> adsorption site in 1-2 position with respect to the OH adsorption site inflicting a 1-4 arrangement (Al O<sub>S</sub>-H inflicting 1-4) to CO another OH or the free Al adsorption are shown. In addition the O<sub>S</sub> site in 1-2 arrangement to its OH adsorption site which is in 1-4 configuration (Al O<sub>S</sub>-H 1-4), caused by a linear adsorption of water is presented. Interlayer distances were computed by averaging over all atoms within one layer. In case of the O<sub>S</sub>-H adsorption site the averaging was done with respect to the none protonated O<sub>S</sub> counterparts.

| Inter layer spacing [Å]        | Coverage H <sub>2</sub> O/CO[%] | Al O <sub>S</sub> -H inflicting 1-4 | Al O <sub>S</sub> -H 1-4 |
|--------------------------------|---------------------------------|-------------------------------------|--------------------------|
|                                |                                 |                                     |                          |
| O <sub>S</sub> /O <sub>2</sub> | A<br>25/25                      | --                                  | 0.089                    |
| O <sub>S</sub> /O <sub>2</sub> | B<br>25/25                      | 0.094                               | --                       |
| O <sub>S</sub> /O <sub>2</sub> | C<br>50/25                      | 0.104                               | 0.116 <sup>34</sup>      |
| O <sub>S</sub> /O <sub>2</sub> | D<br>50/25                      | 0.091                               | 0.107                    |
| O <sub>S</sub> /O <sub>2</sub> | E<br>50/50 <sup>33</sup>        | --                                  | 0.120                    |
| O <sub>S</sub> /O <sub>2</sub> | F<br>50/50 <sup>33</sup>        | 0.101                               | --                       |
| O <sub>S</sub> /O <sub>2</sub> | G<br>75/25                      | 0.118 <sup>35</sup>                 | 0.089                    |

<sup>33</sup> Results of a (1 × 2) surface are represented.

<sup>34</sup> Nearest neighbour to the free adsorption site.

<sup>35</sup> An average value of the two equivalent adsorption site is presented.

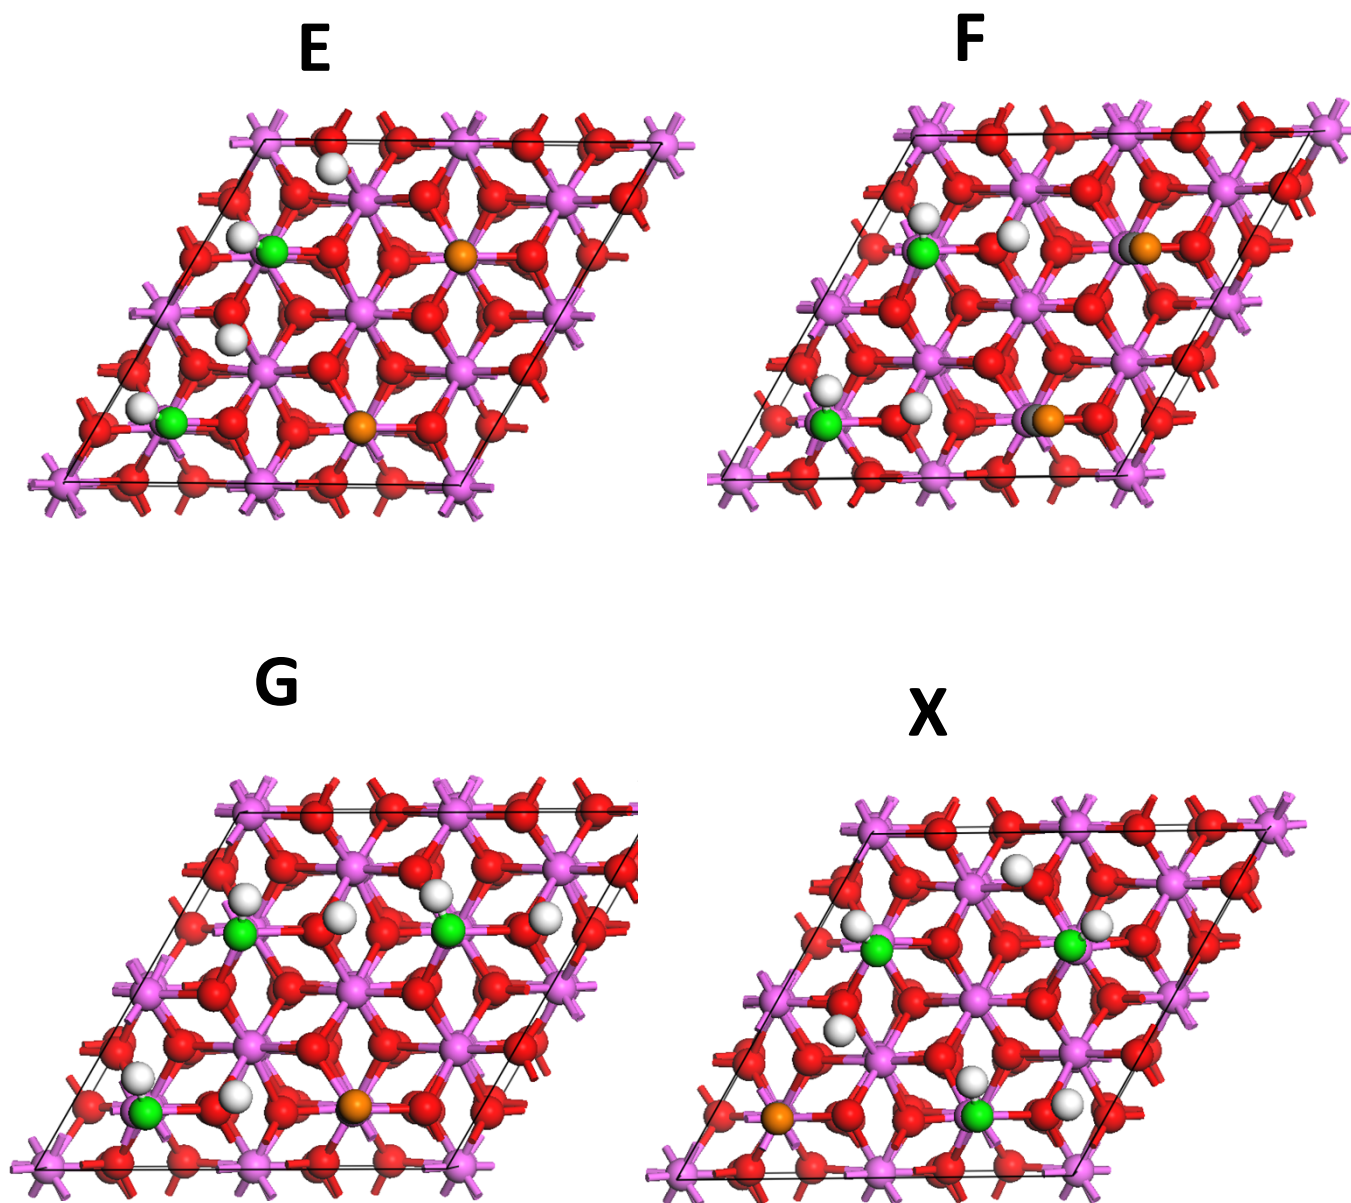

**Figure SM 1:**

(E) 50 % hydroxylation 50 % CO coverage, 1-4 inflicted on the OH adsorption site.

(F) 50 % hydroxylation 50 % CO coverage, 1-4 inflicted on the CO adsorption site.

(G) 75 % hydroxylation 25 % CO coverage, 1-4 inflicted on the CO and the OH adsorption sites.

(X) 75 % hydroxylation 25 % CO coverage, 1-4 inflicted three times on the CO adsorption site.



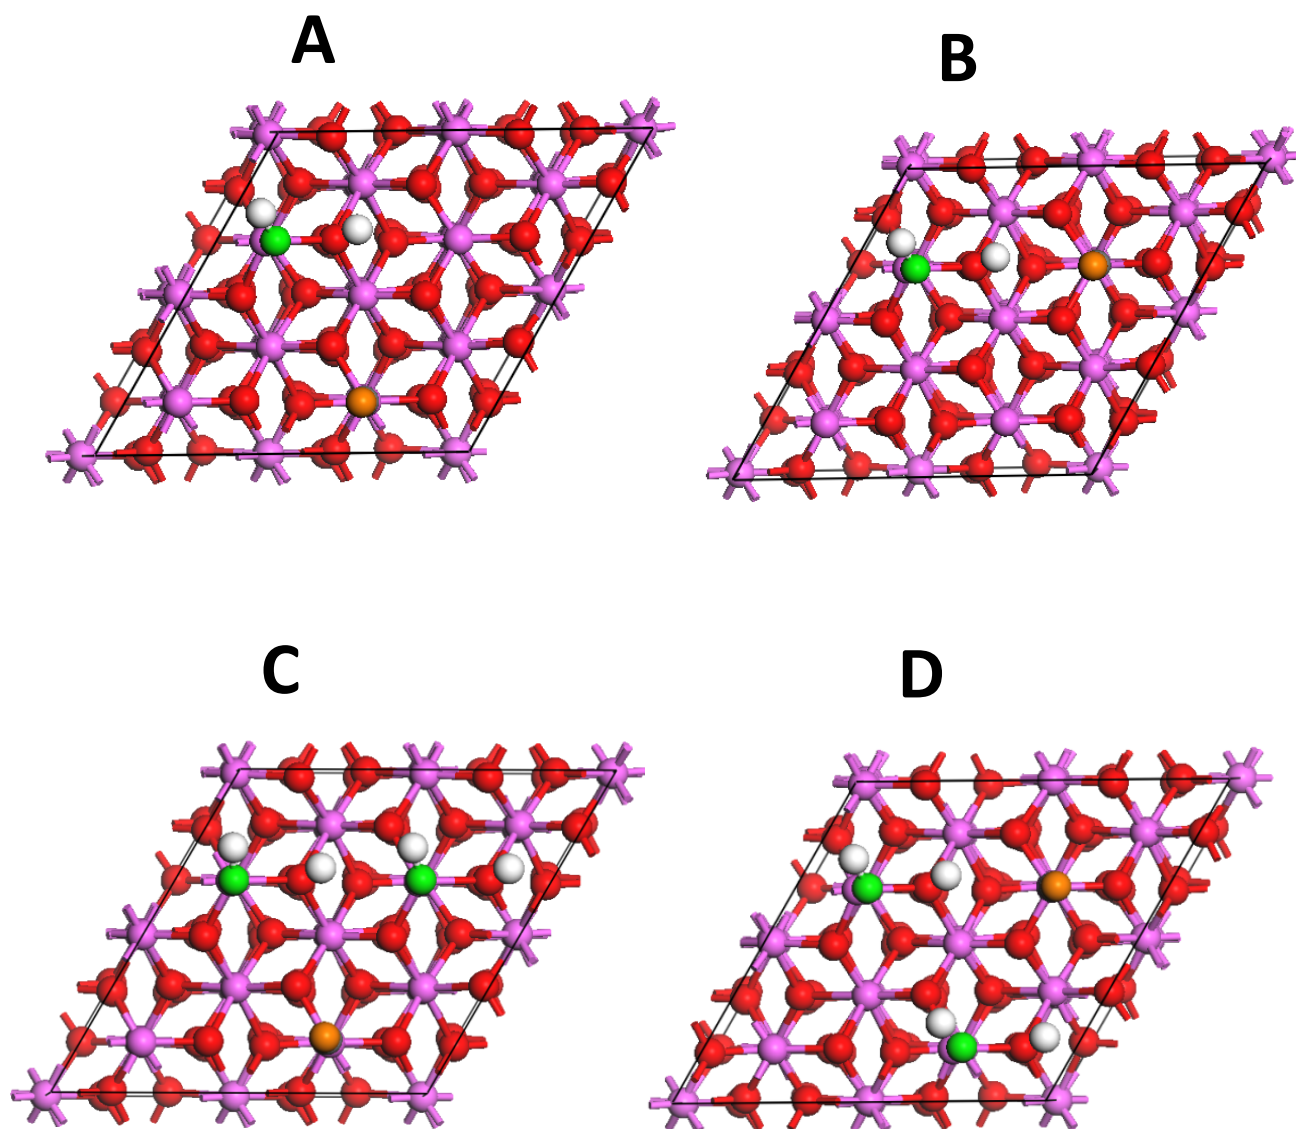

**Figure SM 2:**

(A) 25 % hydroxylation, 1-4 inflicted on the free Al adsorption site.

(B) 25 % hydroxylation, 1-4 inflicted on the CO adsorption site.

(C) 50 % hydroxylation, 1-4 inflicted on two OH adsorption sites.

(D) 50 % hydroxylation, 1-4 inflicted on the CO and the free adsorption site. All results are on the 25% CO coverage.
